# Correction: Cutin:cutin-acid endo-transacylase (CCT), a cuticle-remodelling enzyme activity in the plant epidermis.

Anzhou Xin, Yue Fei, Attila Molnar and  Stephen C. Fry

Xin, A., Fei, Y. Molnar, A. and Fry, S.C. (2021) Cutin:cutin-acid endo-transacylase (CCT), a cuticle-remodelling enzyme activity in the plant epidermis. *Biochem. J.* **478** (4): 777–798. <https://doi.org/10.1042/BCJ20200835>

The authors of this article have noticed that there is an error in the ‘Methods used for supplementary data’ section of their article which they would like to correct. The final sentence of the ‘Chemical synthesis of [<sup>3</sup>H]HHA’ should read: The [<sup>3</sup>H]HHA was located by autoradiography (Supplementary Figure S4b), then the relevant zone (blue rectangle) was eluted in ethyl acetate (yield 3.38 MBq, specific activity  $\approx 9.5$  MBq/ $\mu$ mol).

The authors apologise for this error and declare that this Correction does not change the results or conclusions of the original paper.

Correction published:  
13 April 2023
